# Supplementary material for: Octanuclear Cu(ii) cluster–tungstosilicate composite as efficient electrocatalyst for oxygen evolution reaction at near-neutral pH
Source: Royal Society of Chemistry journal article supplement (doi:10.1039/d1se01221e), 2021-11-20
Supplement: d1se01221e1.pdf [file d1se01221e1.pdf]

## Supporting information

Octanuclear Cu(II) cluster-tungstosilicate composite as efficient electrocatalyst for oxygen evolution at near-neutral pH

Junqi Lin\*, Xin Chen, Nini Wang, Shanshan Liu, Yanmei Chen, Zhengfang Tian, Zhijun Ruan\*

Hubei Key Laboratory of Processing and Application of Catalytic Materials, College of Chemistry and Chemical Engineering, Huanggang Normal University, Huanggang, 438000 China

\* To whom correspondence should be addressed.

E-mail addresses: linjunqi@hgnu.edu.cn, ruanzhijun@hgnu.edu.cn

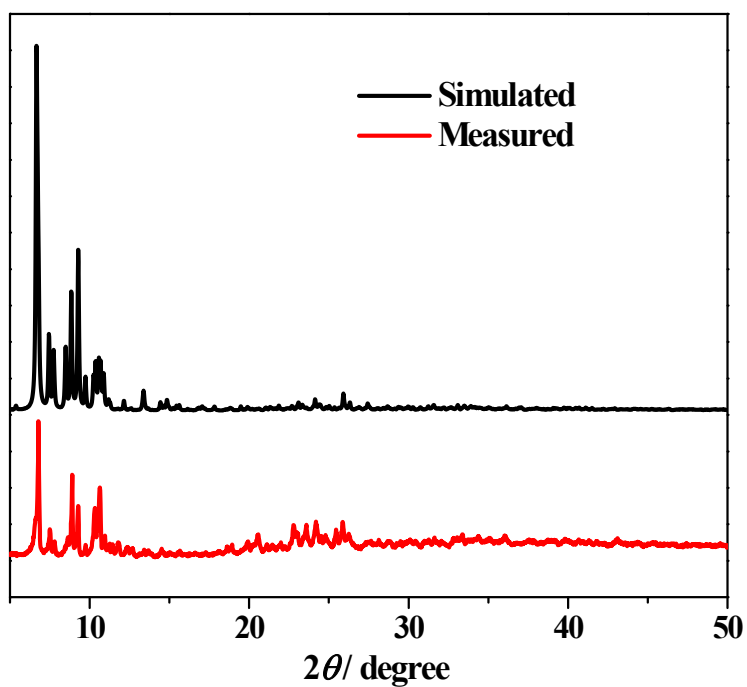

**Fig. S1** Simulated powder X-ray diffraction data of  $[\text{Cu}_8(\text{dpk}\cdot\text{OH})_8(\text{OAc})_4](\text{ClO}_4)_4\cdot 9\text{H}_2\text{O}$  and measured PXRD data of synthesized Cu complex.

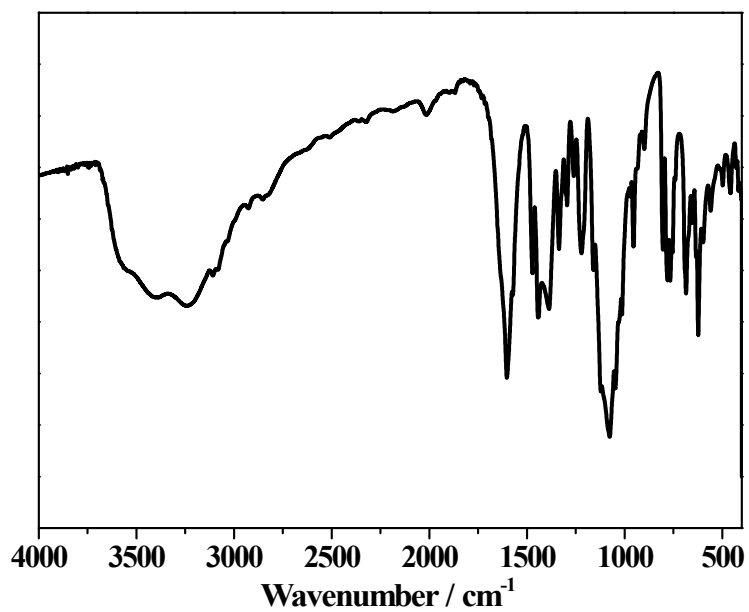

**Fig. S2** FTIR spectrum of synthesized Cu complex: 1604 (s), 1472 (m), 1443 (s), 1221 (m), 1076 (vs), 956 (m), 805 (m), 779 (m), 767 (m), 684 (m), 623 (s).

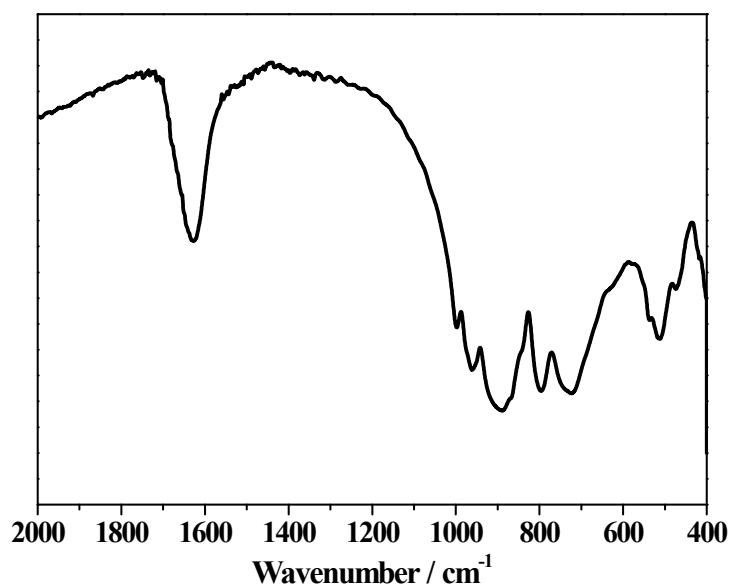

**Fig. S3** FTIR spectrum of synthesized K<sub>8</sub>[α-SiW<sub>11</sub>O<sub>39</sub>]: 1000 (m), 952 (m), 885 (m), 870 (sh), 797 (m), 725 (m), 625 (m), 540 (m), 520 (m), 472(s), 430 (s).

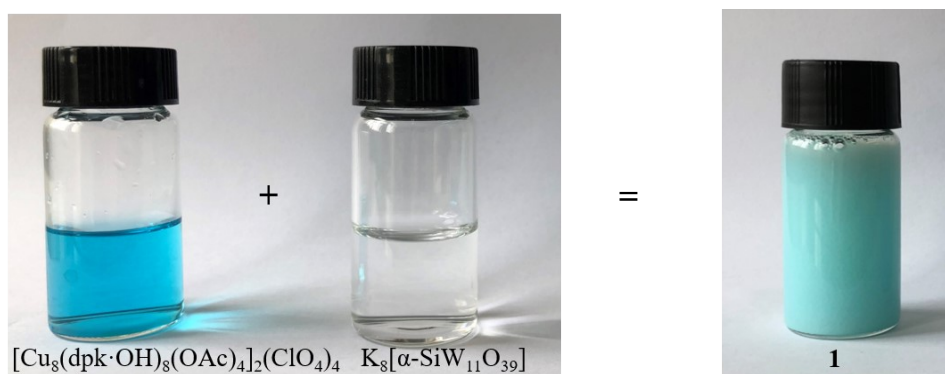

**Fig. S4** Formation process of composite **1**  $[\text{Cu}_8(\text{dpk}\cdot\text{OH})_8(\text{OAc})_4]_2@[\alpha\text{-SiW}_{11}\text{O}_{39}]$  in water.

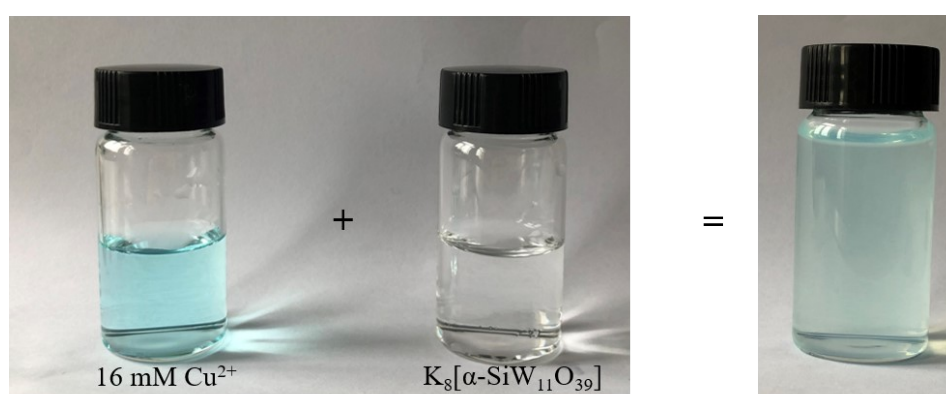

**Fig. S5** Mixing of 16 mM  $\text{Cu}^{2+}$  and 0.2 mM  $\text{K}_8[\alpha\text{-SiW}_{11}\text{O}_{39}]$  in water.

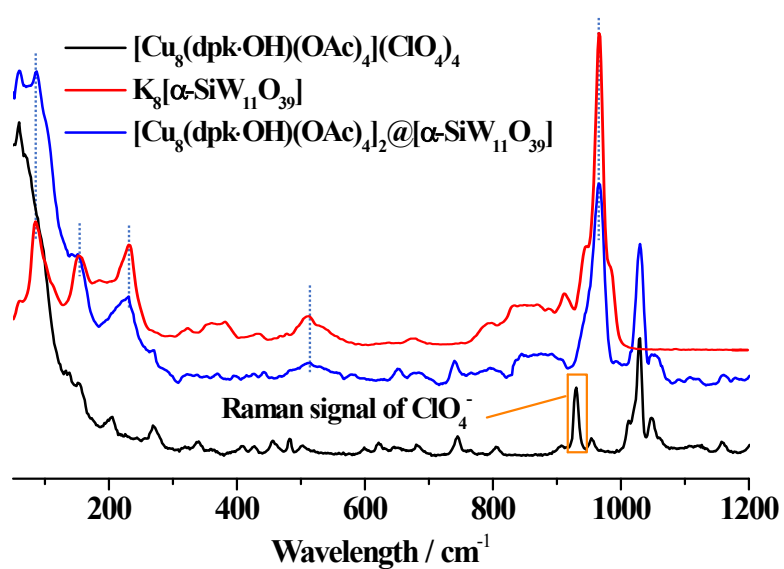

**Fig. S6** Magnified Raman spectrum of composite **1**,  $\text{K}_8[\alpha\text{-SiW}_{11}\text{O}_{39}]$  and Cu cluster.

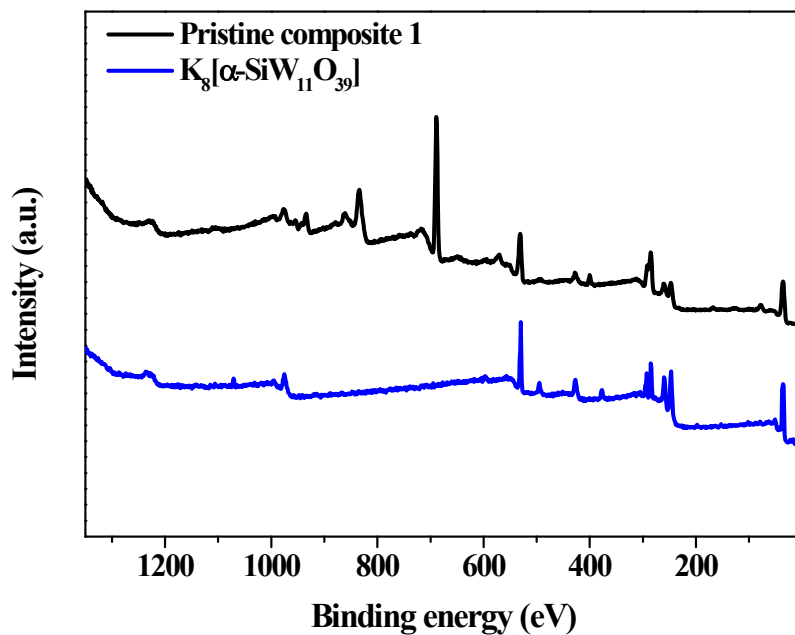

Fig. S7 XPS full scan spectra of composite 1 and polyoxometalate  $K_8[\alpha-SiW_{11}O_{39}]$ .

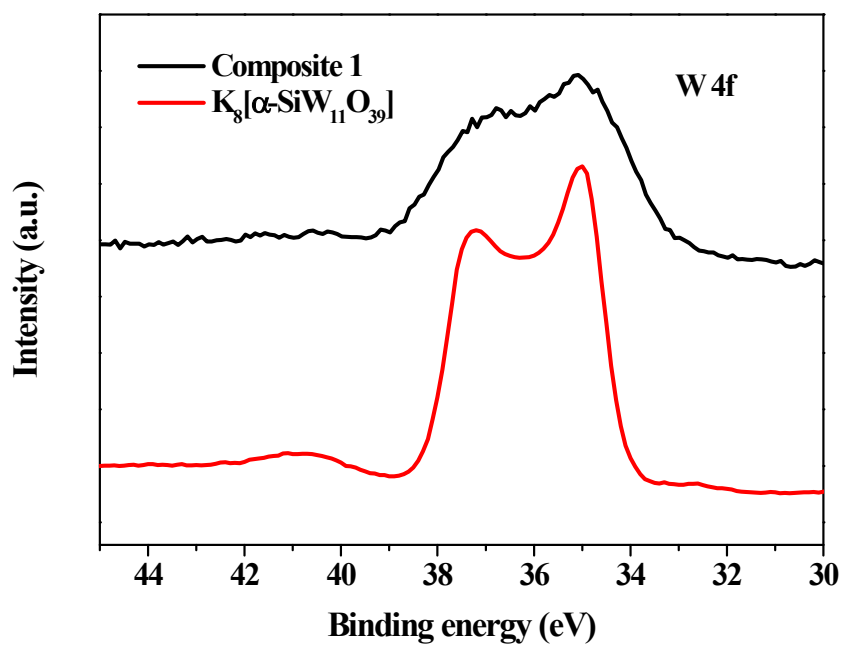

Fig. S8 High-resolution XPS W 4f spectra of composite 1 and polyoxometalate  $K_8[\alpha-SiW_{11}O_{39}]$ .

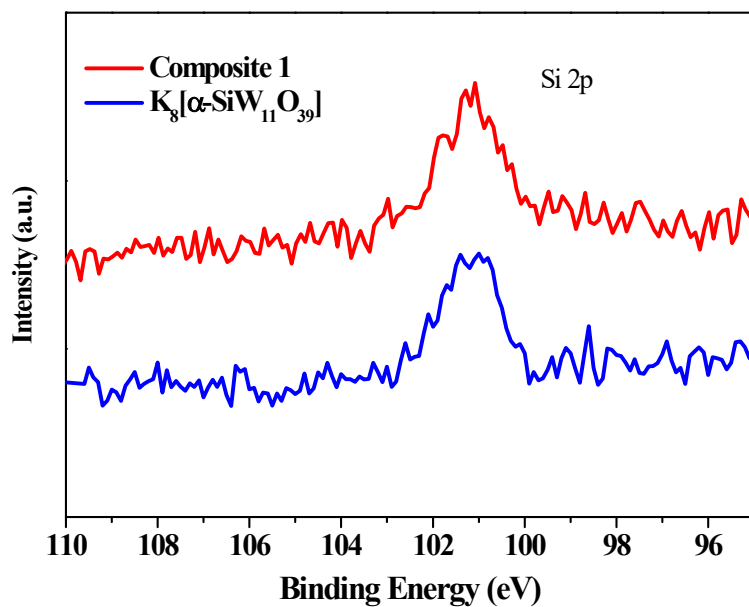

**Fig. S9** High-resolution XPS Si 2p spectra of composite **1** and polyoxometalate K<sub>8</sub>[α-SiW<sub>11</sub>O<sub>39</sub>].

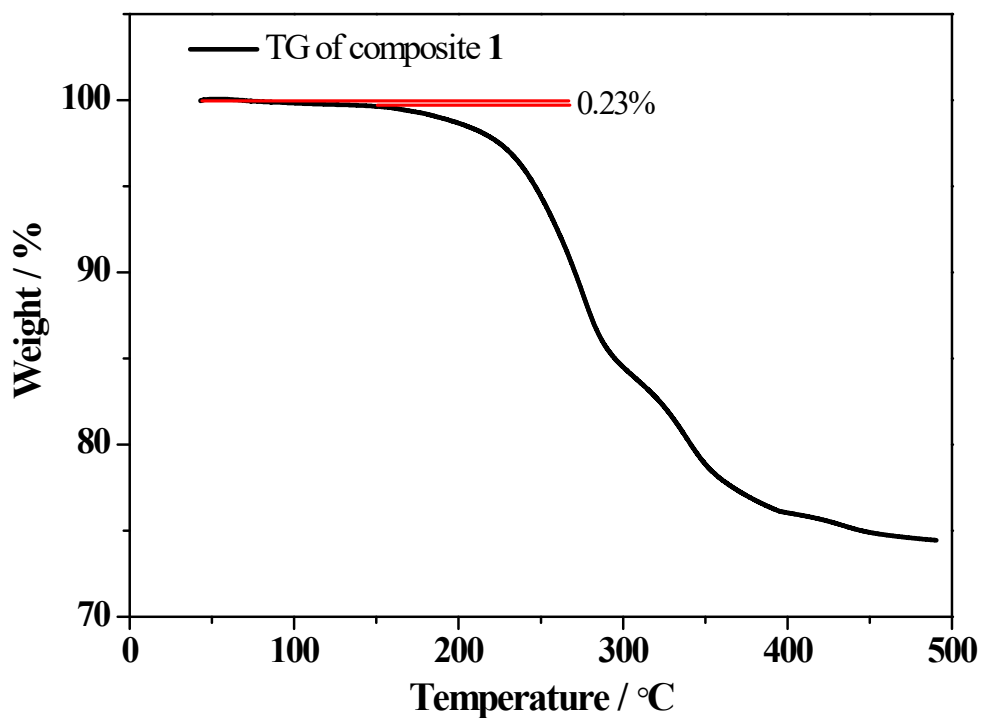

**Fig. S10** TG analysis of composite **1** under N<sub>2</sub> atmosphere, temperature increasing rate: 10 °C / min.

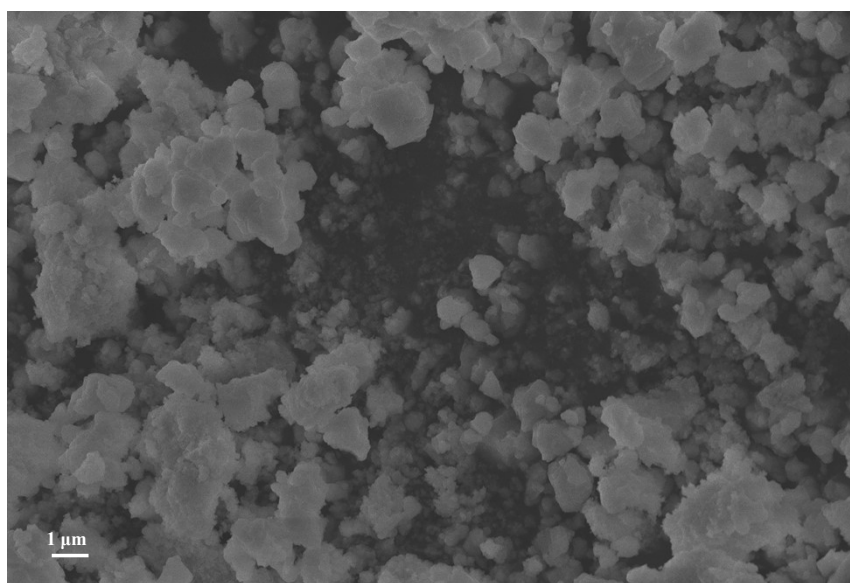

**Fig. S11** The SEM images of the as-synthesized composite 1.

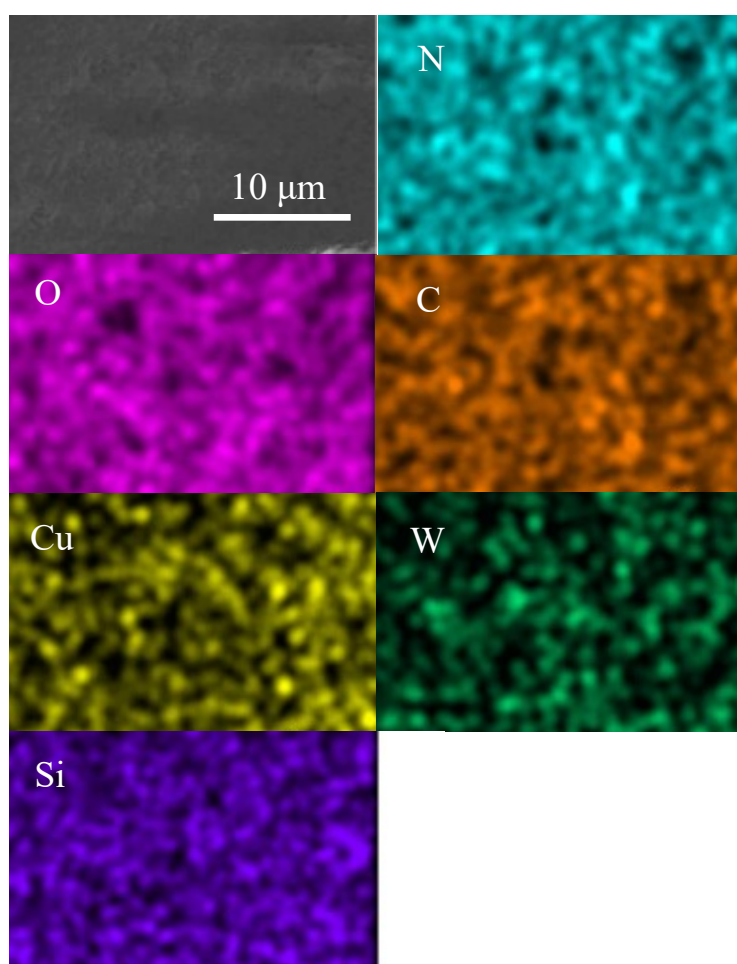

**Fig. S12** EDS mapping images of the as-synthesized composite 1.

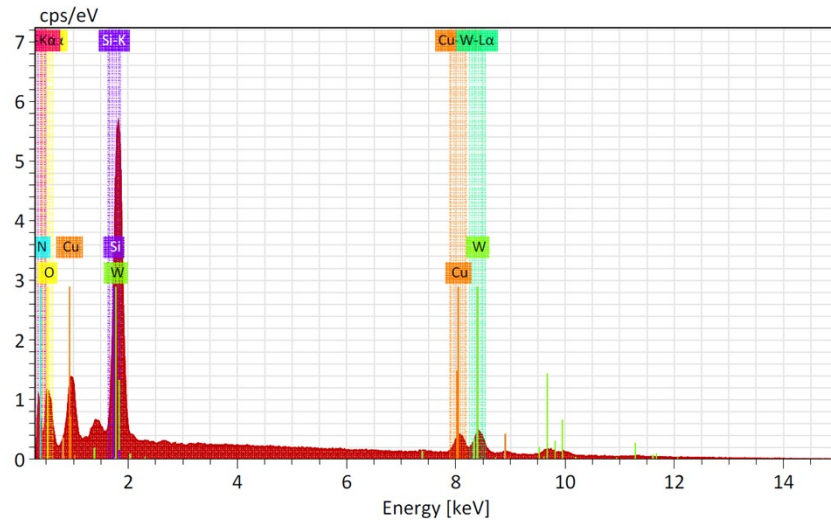

**Fig. S13** EDS spectrum of the as-synthesized composite **1**.

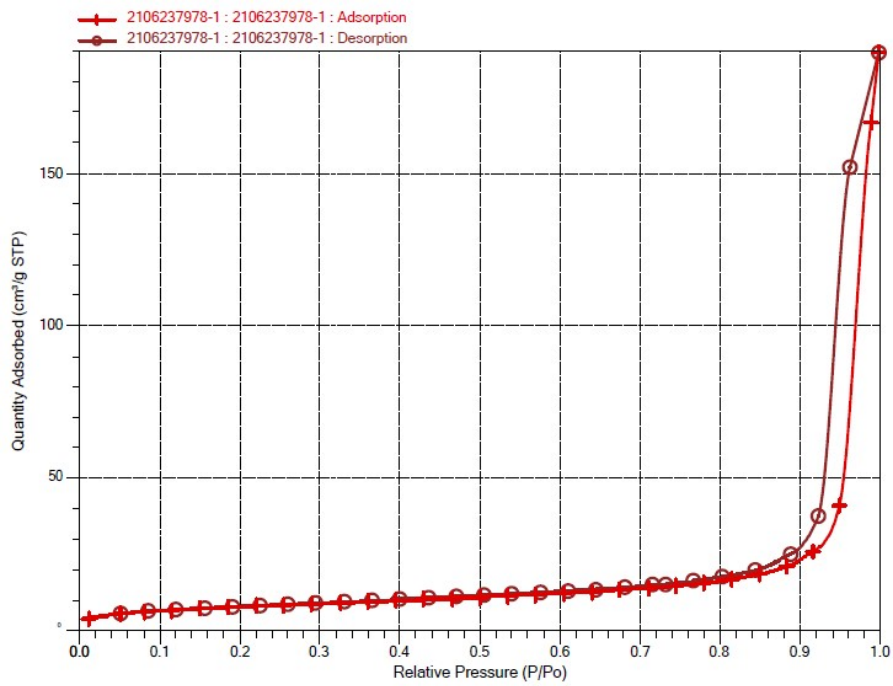

**Fig. S14** The isotherm linear plot of the as-synthesized composite **1**.

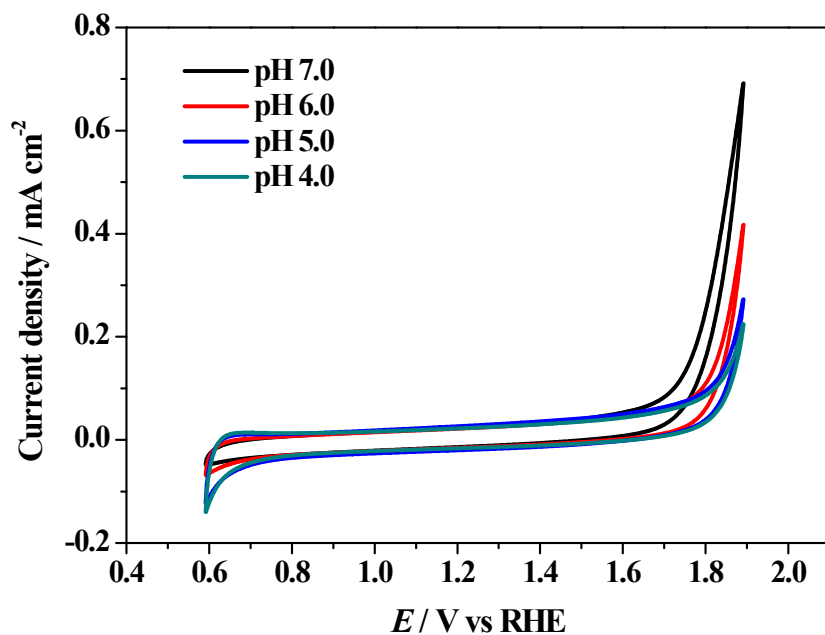

**Fig. S15** CV test of 2 mM of [Cu<sub>8</sub>(dpk·OH)<sub>8</sub>(OAc)<sub>4</sub>](ClO<sub>4</sub>)<sub>4</sub> in 0.1 M PBS at different pH, scan rate = 50 mV/s.

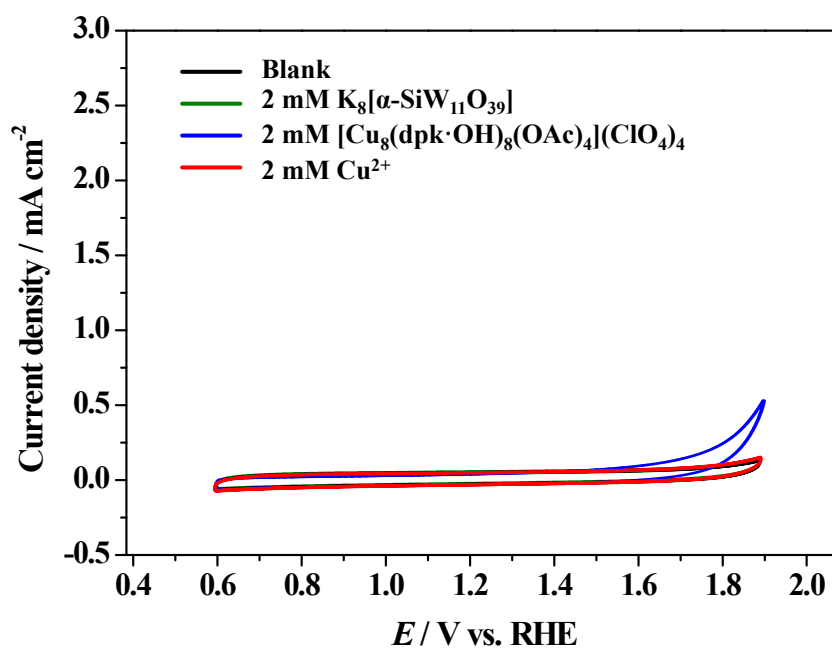

**Fig. S16** CV curves of [Cu<sub>8</sub>(dpk·OH)<sub>8</sub>(OAc)<sub>4</sub>](ClO<sub>4</sub>)<sub>4</sub>, K<sub>8</sub>[α-SiW<sub>11</sub>O<sub>39</sub>] and Cu<sup>2+</sup> in PBS at pH of 6.5, scan rate=50 mV/s.



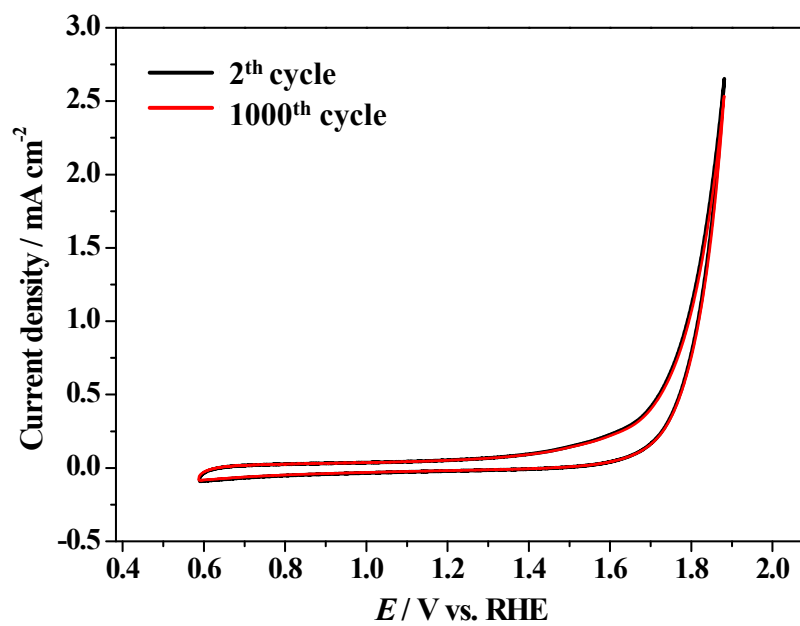

**Fig. S17** Initial (2<sup>nd</sup>) CV curve and 1000<sup>th</sup> CV curve of composite **1** in PBS at pH=6.5, scan rate=50 mV/s.

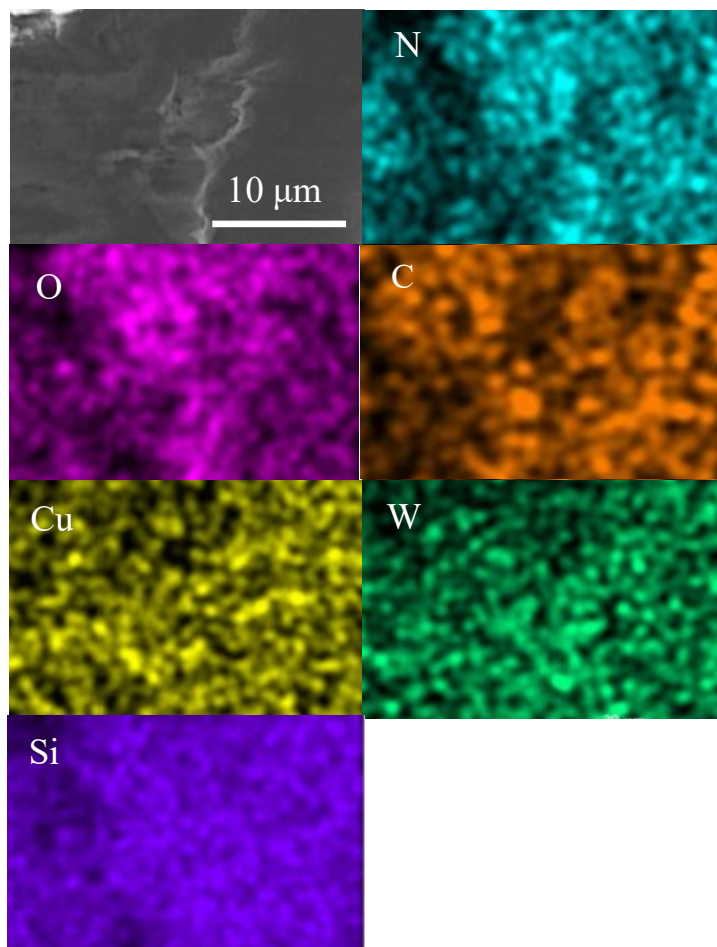

**Fig. S18** EDS mapping images of the post-catalytic composite **1**.

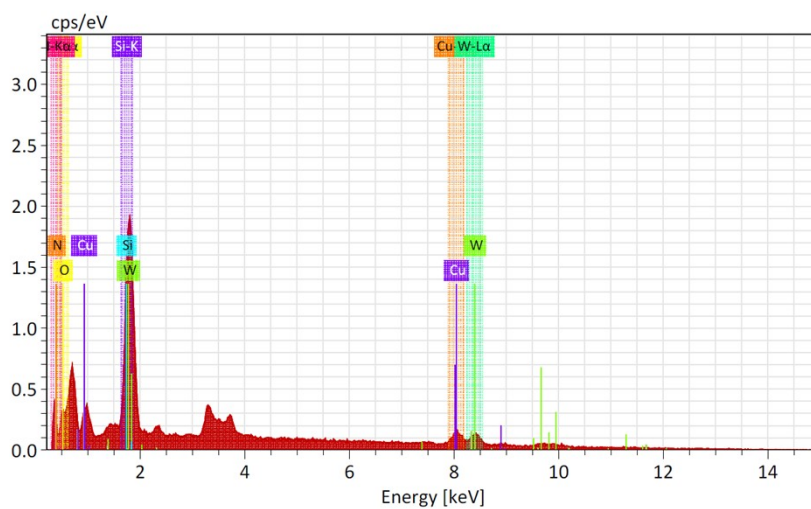

**Fig. S19** EDS spectrum of the post-catalytic composite **1**.

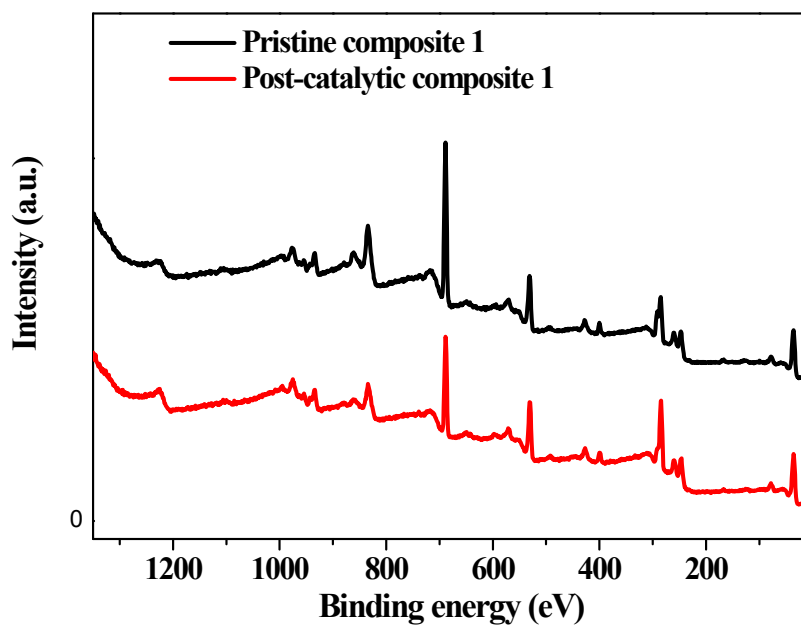

**Fig. S20** XPS full scan spectra of pristine (top), post-catalytic composite **1** and polyoxometalate  $K_8[SiW_{11}O_{39}]$  on FTO electrode used for CPE experiments at 1.40 V (vs. NHE) in PBS at pH of 6.5.

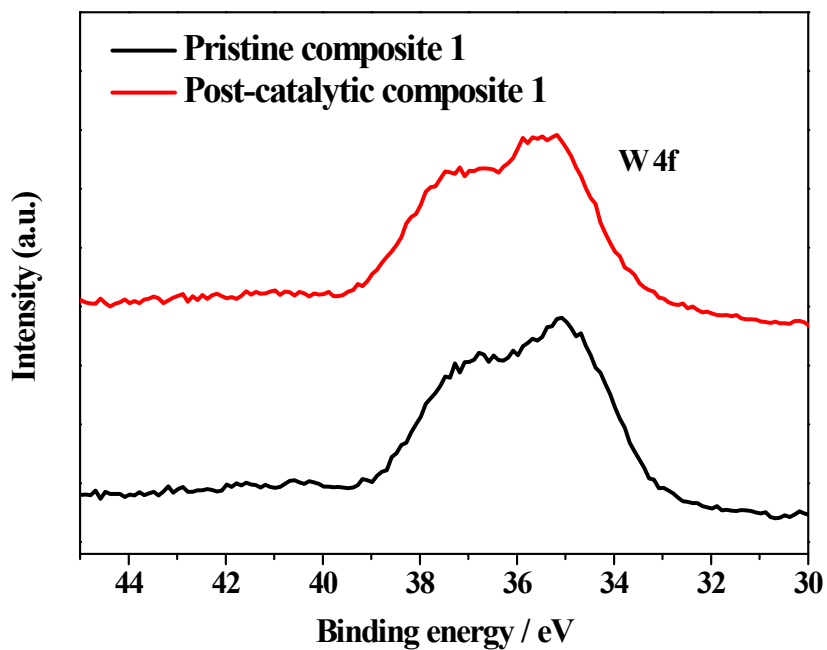

**Fig. S21** High-resolution XPS W 4f spectra of pristine (bottom) and post-catalytic composite **1** on FTO electrode used for CPE experiments at 1.78 V (vs. RHE) in PBS at pH of 6.5.

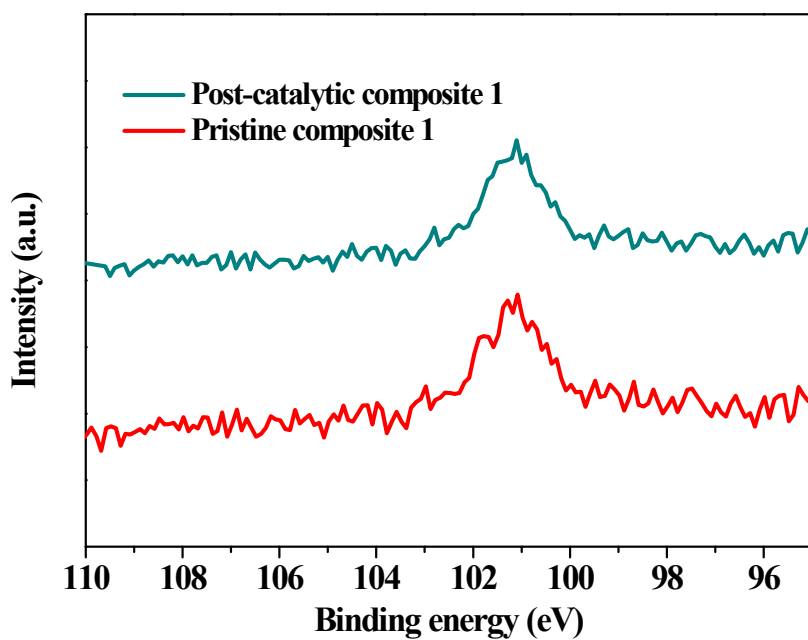

**Fig. S22** High-resolution XPS Si 2p spectra of pristine (bottom) and post-catalytic composite **1** on FTO electrode used for CPE experiments at 1.78V (vs. RHE) in PBS at pH of 6.5.

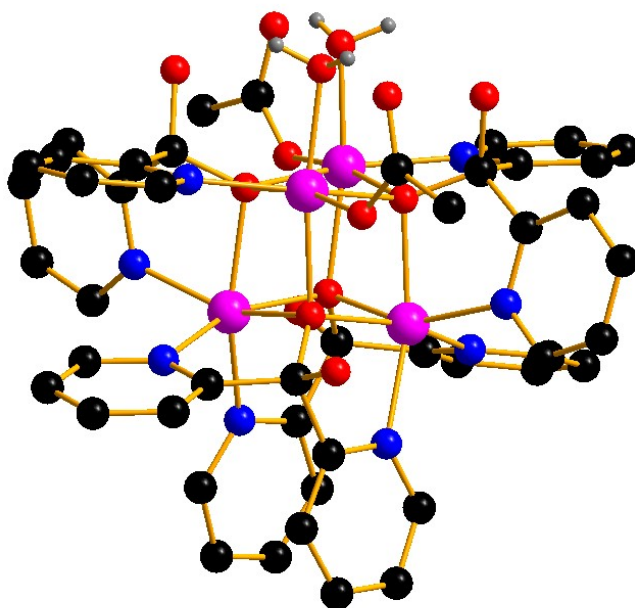

**Fig. S23** The Ball-and-stick representation of  $[\text{Co}_4(\text{dpk}\cdot\text{OH})_4(\text{OAc})_2(\text{H}_2\text{O})_2]^{2+}$  studied in this work (pink, Co; black, C; red, O; blue, N, H atoms in ligand and counter cations  $\text{ClO}_4^-$  were omitted for clarity).

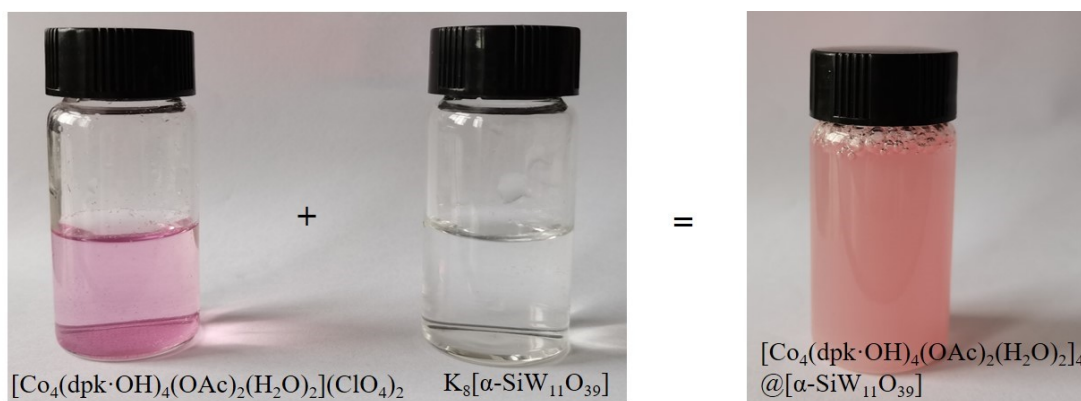

**Fig. S24** Formation process of composite  $[[\text{Co}_4(\text{dpk}\cdot\text{OH})_4(\text{OAc})_2(\text{H}_2\text{O})_2]_4@[\alpha\text{-SiW}_{11}\text{O}_{39}]]$  in water.

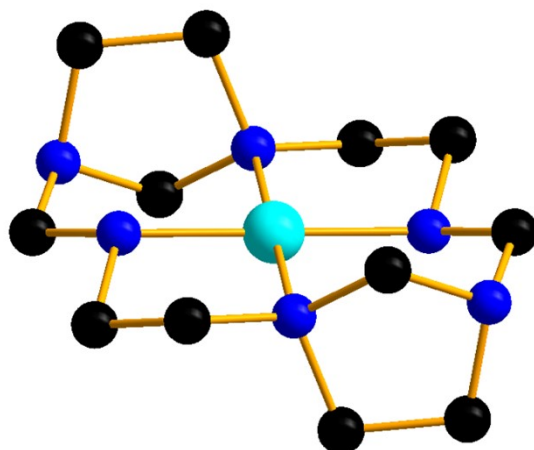

**Fig. S25** The Ball-and-stick representation of  $[\text{Ni}(\text{NHA})]^{2+}$  studied in this work (cyan, Ni; black, C; blue, N, H atoms in ligand and counter cations  $\text{ClO}_4^-$  were omitted for clarity).

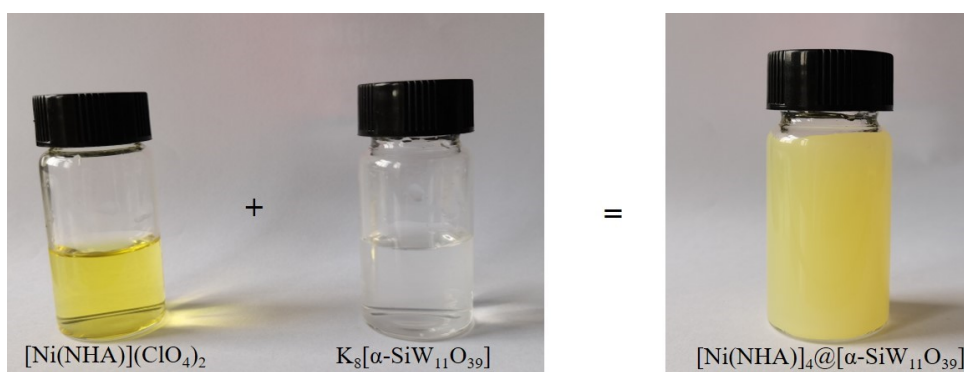

**Fig. S26** Formation process of composite  $[\text{Ni}(\text{NHA})]_4@[\alpha\text{-SiW}_{11}\text{O}_{39}]$  in water.

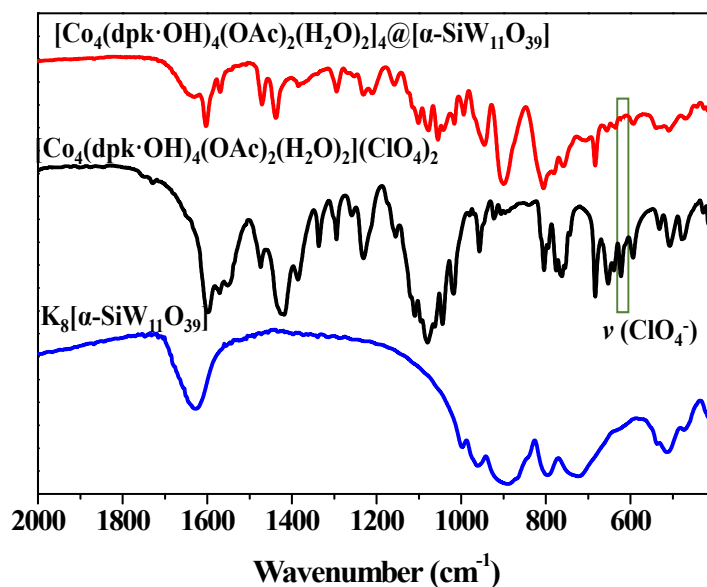

**Fig. S27** FTIR spectra of composite  $[\text{Co}_4(\text{dpk}\cdot\text{OH})_4(\text{OAc})_2(\text{H}_2\text{O})_2]_4@[\alpha\text{-SiW}_{11}\text{O}_{39}]$  (red),  $[\text{Co}_4(\text{dpk}\cdot\text{OH})_4(\text{OAc})_2(\text{H}_2\text{O})_2](\text{ClO}_4)_2$  (black) and  $\text{K}_8[\alpha\text{-SiW}_{11}\text{O}_{39}]$  (blue).

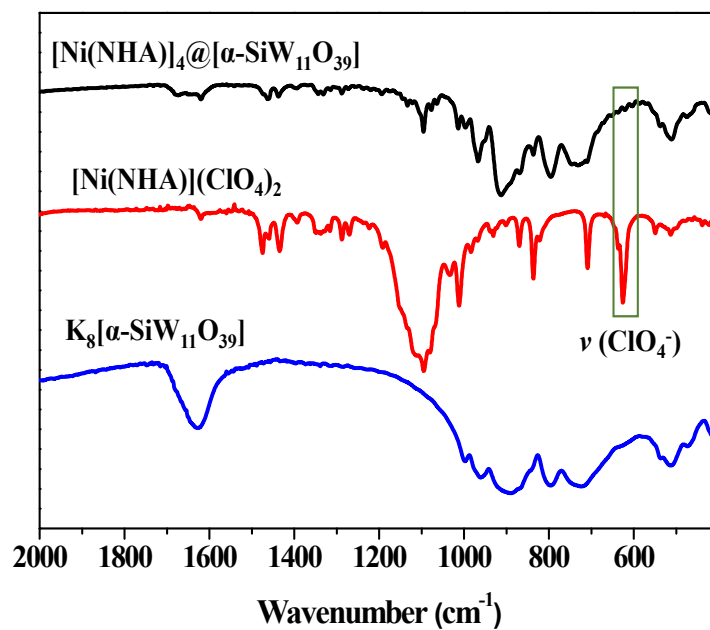

**Fig. S28** FTIR spectra of composite  $[\text{Ni}(\text{NHA})]_4@[\alpha\text{-SiW}_{11}\text{O}_{39}]$  (black),  $[\text{Ni}(\text{NHA})](\text{ClO}_4)_2$  (red) and  $\text{K}_8[\alpha\text{-SiW}_{11}\text{O}_{39}]$  (blue).

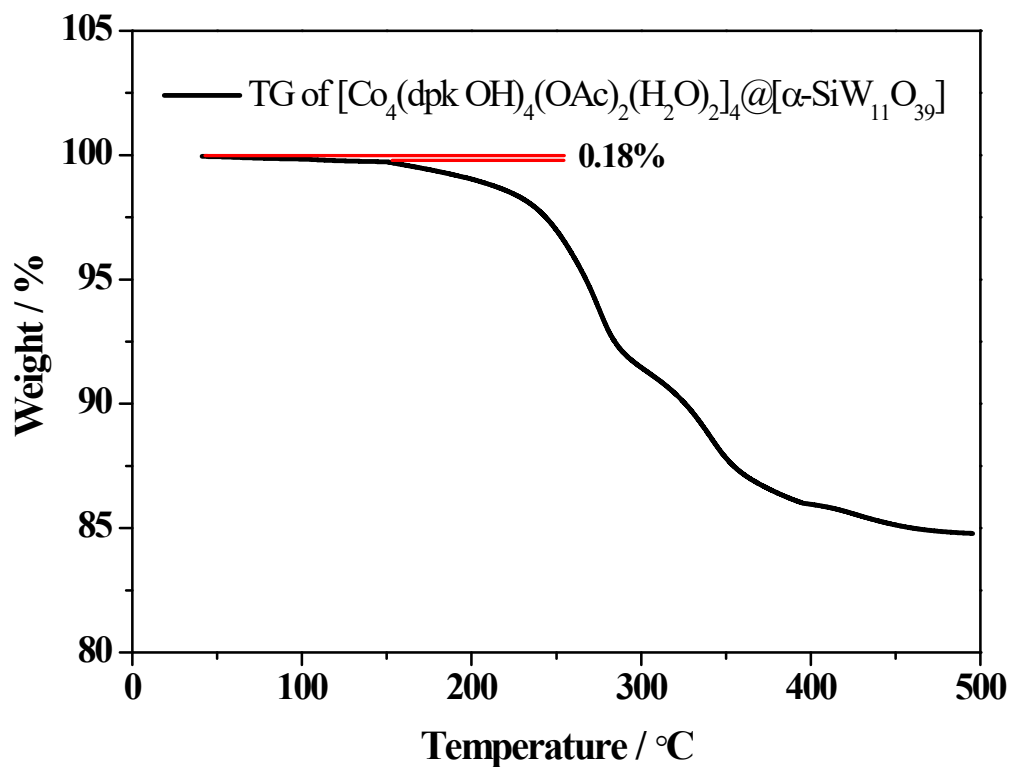

**Fig. S29** TG analysis of Co-containing under  $\text{N}_2$  atmosphere, temperature increasing rate: 10  $^{\circ}\text{C} / \text{min}$ .

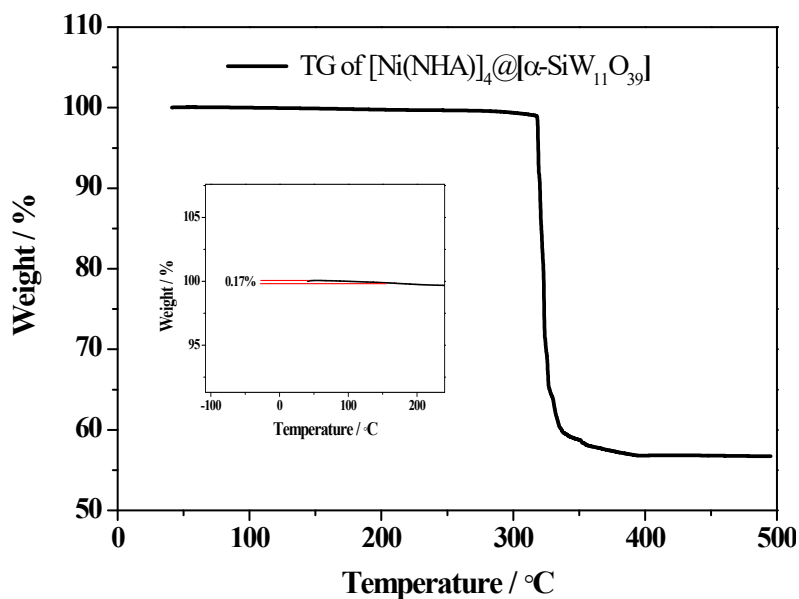

**Fig. S30** TG analysis of Ni-containing under  $\text{N}_2$  atmosphere, temperature increasing rate: 10 °C / min.

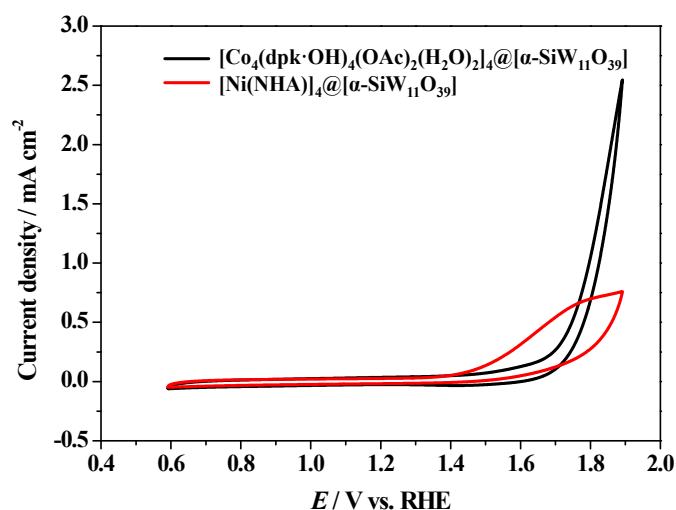

**Fig. S31** Cyclic voltammograms of composite  $[\text{Co}_4(\text{dpk}\cdot\text{OH})_4(\text{OAc})_2(\text{H}_2\text{O})_2]_4@[\alpha\text{-SiW}_{11}\text{O}_{39}]$  and  $[\text{Ni}(\text{NHA})_4]@[\alpha\text{-SiW}_{11}\text{O}_{39}]$  in 0.1 M PBS at pH of 6.5, with GC electrode (0.071  $\text{cm}^2$ ) coated with composite as working electrode. scan rate=50 mV/s.

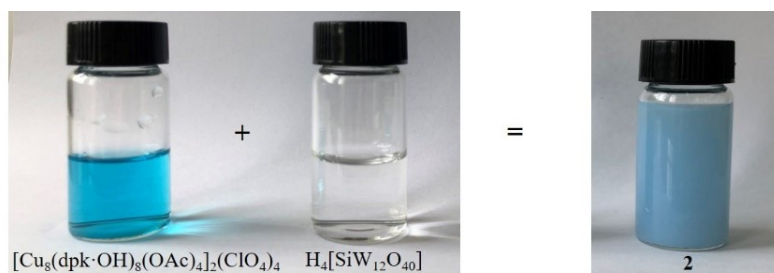

**Fig. S32** Formation process of composite  $[\text{Cu}_8(\text{dpk}\cdot\text{OH})_8(\text{OAc})_4]@[\text{SiW}_{12}\text{O}_{40}]$  in water.

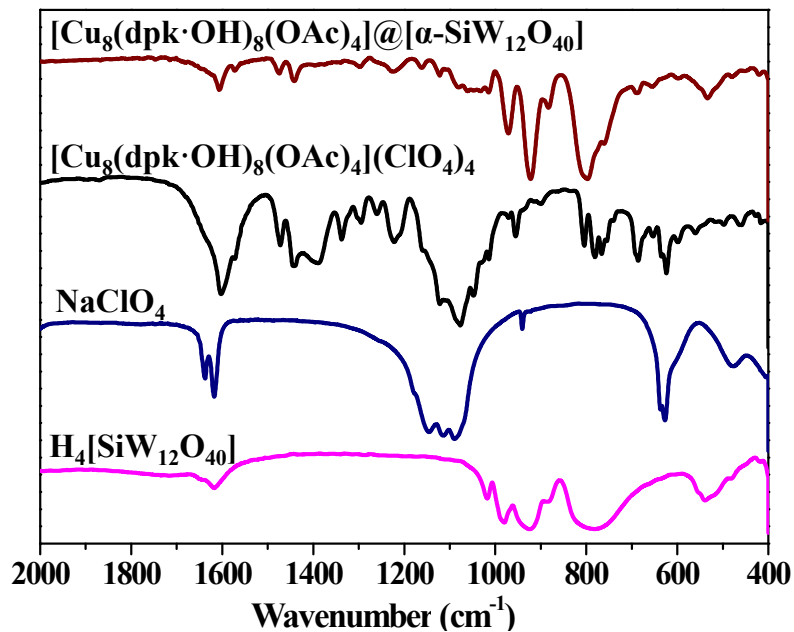

**Fig. S33** FTIR spectra of composite [Cu<sub>8</sub>(dpk·OH)<sub>8</sub>(OAc)<sub>4</sub>]@[SiW<sub>12</sub>O<sub>40</sub>] (brown), [Cu<sub>8</sub>(dpk·OH)<sub>8</sub>(OAc)<sub>4</sub>](ClO<sub>4</sub>)<sub>4</sub> (black) and H<sub>4</sub>[SiW<sub>12</sub>O<sub>40</sub>] (pink).

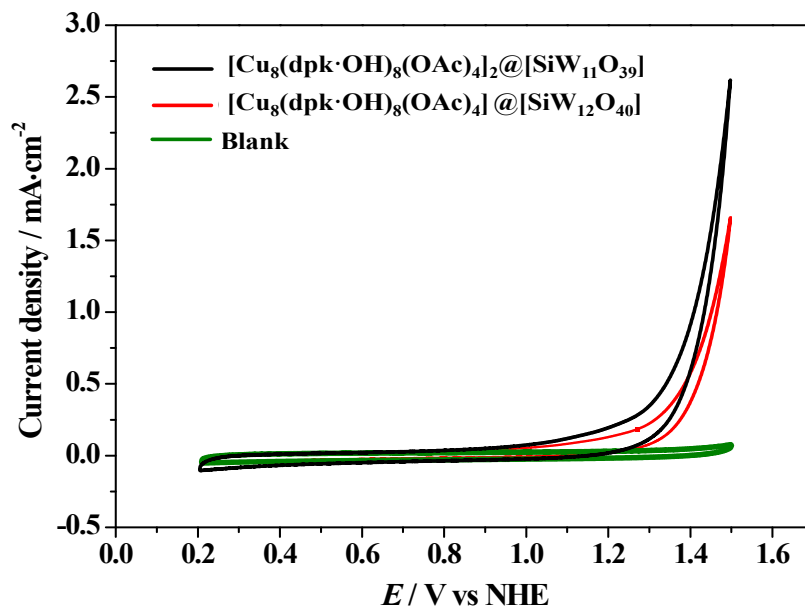

**Fig. S34** Electrochemical test of composite [Cu<sub>8</sub>(dpk·OH)<sub>8</sub>(OAc)<sub>4</sub>]<sub>2</sub>@[α-SiW<sub>11</sub>O<sub>39</sub>] and [Cu<sub>8</sub>(dpk·OH)<sub>8</sub>(OAc)<sub>4</sub>]@[SiW<sub>12</sub>O<sub>40</sub>] in 0.1 M PBS at pH 6.5.



**Table S1.** Performance of some selected Cu-based heterogeneous catalysts in electrochemical water oxidation.

| Catalyst                                        | Electrolyte                           | pH   | Current density (mA/cm <sup>2</sup> ) | $\eta$ (mV) | Ref.      |
|-------------------------------------------------|---------------------------------------|------|---------------------------------------|-------------|-----------|
| Cu-Bi film                                      | 0.2 M KBi                             | 9.0  | 1.2                                   | 600         | S1        |
| CuO-based                                       | 0.1 M KBi                             | 9.2  | 1.0                                   | 430         | S2        |
| CuO nanowires                                   | 0.1 M KBi                             | 9.2  | 0.1                                   | 430         | S3        |
| Cu(TCA)-film                                    | 0.1 M Acetate buffer                  | 6.0  | 1.0                                   | 720         | S4        |
| Cu(OH) <sub>2</sub>                             | 0.1 M KBi                             | 9.2  | 0.1                                   | 550         | S5        |
| [Cu <sub>2</sub> -P <sub>o</sub> ] <sub>n</sub> | 0.1 M KPi                             | 9.2  | 1.0                                   | 644         | S6        |
| Cu <sub>2</sub> O film                          | 0.1 M KBi                             | 9.2  | 1.0                                   | 450         | S7        |
| Cu-CO <sub>3</sub>                              | 0.5 M Na <sub>2</sub> CO <sub>3</sub> | 10.8 | 1.0                                   | 485         | S8        |
| Cu-TEOA                                         | 0.1 M Acetate buffer                  | 12.4 | 0.1                                   | 560         | S9        |
| Cu(en)(OH <sub>2</sub> ) <sub>4</sub>           | 0.2 M PBS                             | 12   | 1.0                                   | 540         | S10       |
| Cu-Gly film                                     | 0.2 M PBS                             | 12   | 1.0                                   | 450         | S11       |
| Cu-Tris film                                    | 0.2 M PBS                             | 12.4 | 1.0                                   | 390         | S12       |
| Composite 1                                     | 0.1 M NaPi                            | 6.5  | 1.0                                   | 580         | This work |

$\eta$  = overpotential; HTCA = 1-mesityl-1H-1,2,3-triazole-4-carboxylic acid; en = 1,2-ethylenediamine  
TEOA = triethanolamine; Gly = glycine; Tris = tris(hydroxymethyl)aminomethane.

## References

- S1 F. Yu, F. Li, B. Zhang, H. Li and L. Sun, *ACS Catal.*, 2014, **5**, 627–630.
- S2 X. Liu, S. Cui, Z. Sun, Y. Ren, X. Zhang and P. Du, *J. Phys. Chem. C.*, 2016, **120**, 831–840.
- S3 X. Liu, S. Cui, Z. Sun and P. Du, *Electrochim. Acta.*, 2015, **160**, 202–208.
- S4 H. A. Younus, Y. Zhang, M. Vandichel, N. Ahmad, K. Laasonen, F. Verpoort, C. Zhang and S. Zhang, *ChemSusChem*, 2020, **13**, 5088–5099.
- S5 S. Cui, X. Liu, Z. Sun and P. Du, *ACS Sustainable Chem. Eng.*, 2016, **4**, 2593–2600.
- S6 R. Mishra, E. Ülker and F. Karadas, *ChemElectroChem*, 2017, **4**, 75–80.
- S7 X. Liu, Z. Sun, S. Cui and P. Du, *Electrochim. Acta.*, 2016, **187**, 381–388.
- S8 J. Du, Z. Chen, S. Ye, B. J. Wiley and T. J. Meyer, *Angew. Chem. Int. Ed.*, 2015, **54**, 2073–2078.

- S9 T.-T. Li, S. Cao, C. Yang, Y. Chen, X.-J. Lv and W.-F. Fu, *Inorg. Chem.*, 2015, **54**, 3061–3067.
- S10 C. Lu, J. Du, X.-J. Su, M.-T. Zhang, X. Xu, T. J. Meyer and Z. Chen, *ACS Catal.*, 2016, **6**, 77–83.
- S11 C. Lu, J. Wang and Z. Chen, *ChemCatChem*, 2016, **8**, 2165-2170.
- S12 H. Chen, Y. Gao, Z. Lu, L. Ye and L. Sun, *Electrochim. Acta.*, 2017, **230**, 501–507.
